# Supplementary material for: The Source of the River as a Nursery for Microbial Diversity
Source: PLoS One. 2015 Mar 24;10(3):e0120608. doi: 10.1371/journal.pone.0120608 (PMC4372583; doi:10.1371/journal.pone.0120608)
Supplement: S3 Table — The columns represent the set of samples for PhyChem (Set1–4) and Course (upper, middle and lower) used as the potential source. The rows represent the samples from winter, which were used as the sink, to determine the percent similarity in relation to the summer samples. Unknown values indicate the percentage of the differences in the bacterial composition and structure that are not present in the summer samples. (XLSX) [file pone.0120608.s010.xlsx]

## Sheet: S3 Table 
Course SourceTrack Results
	source
SampleID/sink	Set4	Set3	Set2	Set1	Unknown
W14	0.2746	0.2913	0.0082	0.2507	0.1752
W13	0.351	0.0091	0.0015	0.4047	0.2337
W12	0.2992	0.209	0.0019	0.3076	0.1823
W11	0.3166	0.2367	0.0001	0.2486	0.198
W10	0.2026	0.3081	0.0284	0.2879	0.173
W09	0.0783	0.1155	0.0278	0.585	0.1934
W08	0.0606	0.1534	0.0077	0.6257	0.1526
W07	0.0729	0.1808	0.0741	0.4875	0.1847
W06	0.0486	0.0451	0.0026	0.7229	0.1808
W05	0.0895	0.0801	0.0958	0.5368	0.1978
W04	0.0159	0	0.0419	0.7109	0.2313
W03	0.1192	0	0.0001	0.6814	0.1993
W02	0.0581	0	0.035	0.6054	0.3015
W01	0.0167	0	0.0001	0.5734	0.4098
Average	0.143129	0.116364	0.0232286	0.502036	0.215243
Course SourceTrack Results
	source
SampleID/sink	Lower	Middle	Upper	Unknown
W14	0.1984	0.4011	0.2247	0.1758
W13	0.2389	0.115	0.4125	0.2336
W12	0.1943	0.3063	0.3318	0.1676
W11	0.2091	0.3667	0.2158	0.2084
W10	0.1359	0.4032	0.3	0.1609
W09	0.0403	0.1499	0.6478	0.162
W08	0.0015	0.2122	0.644	0.1423
W07	0.0091	0.1997	0.6174	0.1738
W06	0.0029	0.1139	0.7121	0.1711
W05	0.0002	0.1424	0.6244	0.233
W04	0.0436	0	0.7446	0.2118
W03	0.0773	0	0.755	0.1677
W02	0.0087	0	0.6743	0.317
W01	0.0529	0	0.5645	0.3826
Average	0.087	0.172	0.533	0.208
